# Supplementary material for: Mucosal Vaccination with UV-Inactivated Chlamydia suis in Pre-Exposed Outbred Pigs Decreases Pathogen Load and Induces CD4 T-Cell Maturation into IFN-γ+ Effector Memory Cells
Source: Vaccines (Basel). 2020 Jul 2;8(3):353. doi: 10.3390/vaccines8030353 (PMC7564508; doi:10.3390/vaccines8030353)
Supplement: Supplementary file 1 [file vaccines-08-00353-s001.zip]

Archive with 6 entries (6 files):
- Amaral et al, 2020_Sup Figure S2.pdf
- Amaral et al, 2020_Sup Figure S1.pdf
- Amaral et al, 2020_Sup Figure S4.pdf
- Amaral et al, 2020_Sup Figure S3.pdf
- Amaral et al, 2020_Sup Figure S5.pdf
- Amaral et al, 2020_Sup Table S1.pdf
