# Supplementary material for: Mucosal Vaccination with UV-Inactivated Chlamydia suis in Pre-Exposed Outbred Pigs Decreases Pathogen Load and Induces CD4 T-Cell Maturation into IFN-γ+ Effector Memory Cells
Source: Vaccines (Basel). 2020 Jul 2;8(3):353. doi: 10.3390/vaccines8030353 (PMC7564508; doi:10.3390/vaccines8030353)
Supplement: Supplementary file 1 [file vaccines-08-00353-s001.zip › Amaral et al, 2020_Sup Figure S1.pdf]

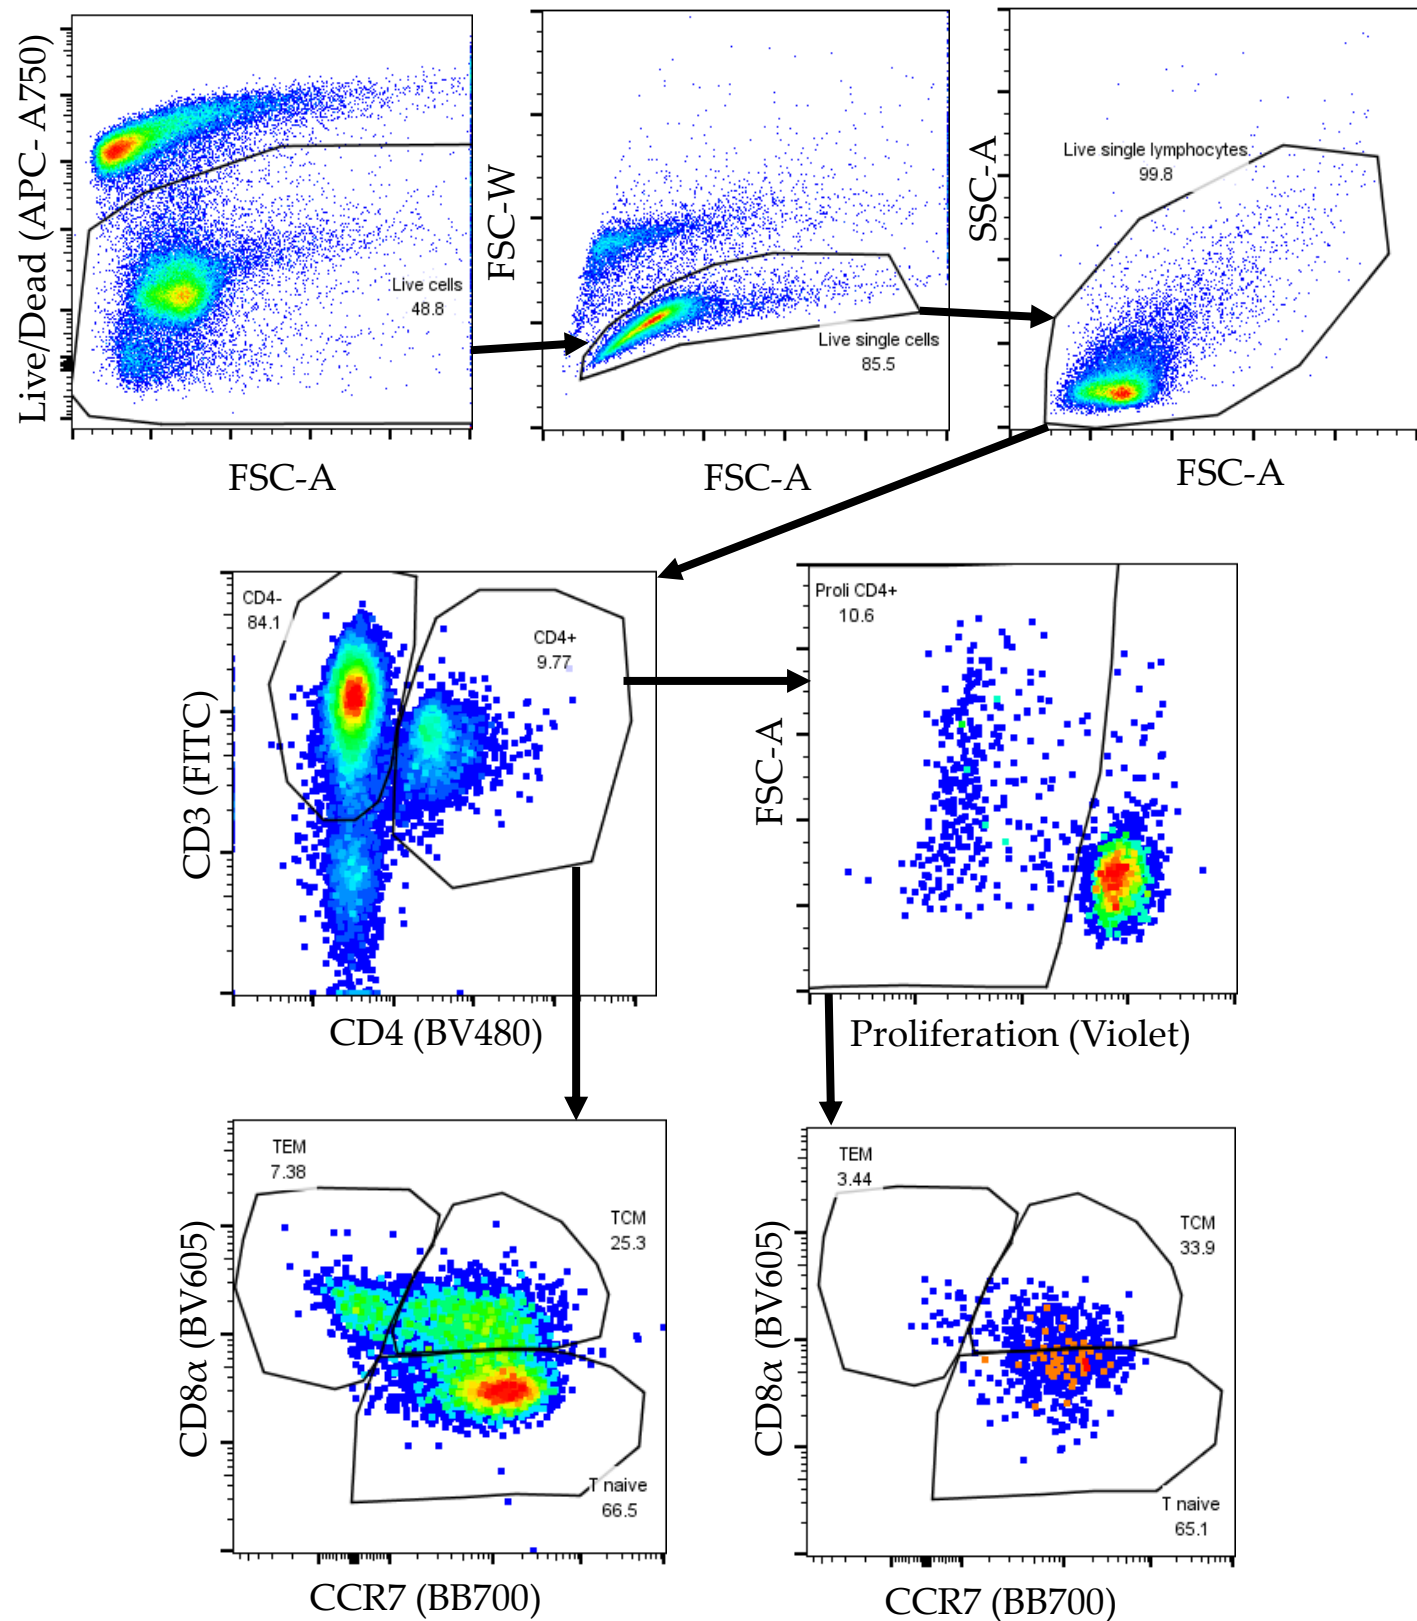

**Supplementary Figure S1. Gating hierarchy for PBMC proliferation analysis via flow cytometry.** Proliferation of CD4<sup>+</sup> T cells was analyzed by CellTrace™ Violet in combination with FCM stainings for immune markers. Live cells were identified by a gate on Live/Dead Near infra red staining. Next, doublets were excluded by an FSC-A (area)/FSC-W (width) gate. Lymphocytes were then identified by cell size (FSC-A) and granularity (SSC-A). CD4<sup>+</sup> T cells were identified via their CD3 and CD4 expression. Within these CD4<sup>+</sup> T cells, proliferation was analyzed using a CellTrace™ Violet/FSC-A gate. CD4<sup>+</sup> and proliferating CD4<sup>+</sup> cells were further differentiated into naïve (T naïve), central (T<sub>CM</sub>) and effector memory cells (T<sub>EM</sub>) via CCR7 and CD8 $\alpha$  markers: T<sub>CM</sub> is CCR7<sup>+</sup>CD8 $\alpha$ <sup>+</sup> and T<sub>EM</sub> is CCR7<sup>+</sup>CD8 $\alpha$ <sup>+</sup>. Gating is based on relevant fluorescent minus one (FMO) controls.
