# Supplementary material for: Mucosal Vaccination with UV-Inactivated Chlamydia suis in Pre-Exposed Outbred Pigs Decreases Pathogen Load and Induces CD4 T-Cell Maturation into IFN-γ+ Effector Memory Cells
Source: Vaccines (Basel). 2020 Jul 2;8(3):353. doi: 10.3390/vaccines8030353 (PMC7564508; doi:10.3390/vaccines8030353)
Supplement: Supplementary file 1 [file vaccines-08-00353-s001.zip › Amaral et al, 2020_Sup Figure S2.pdf]

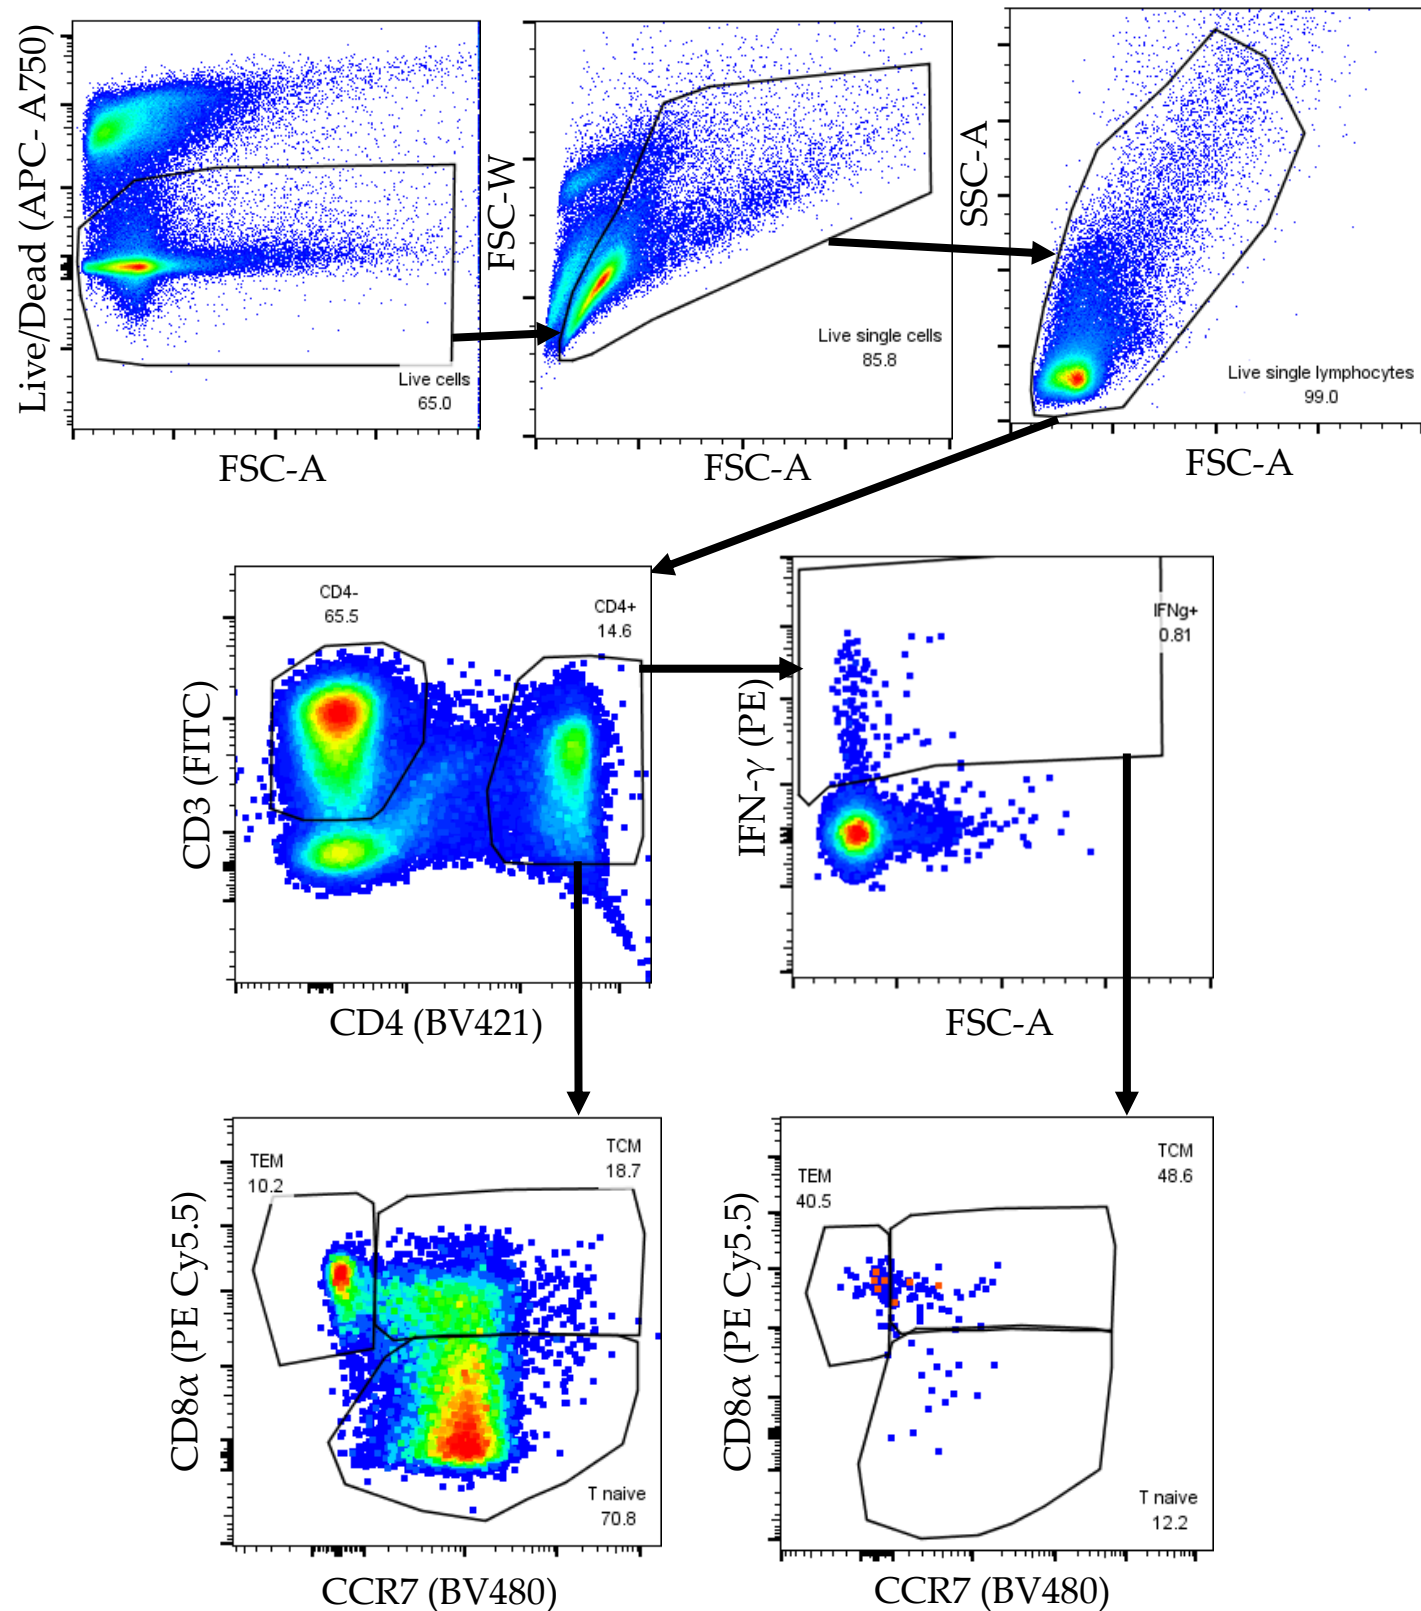

**Supplementary Figure S2. Gating hierarchy for PBMC intracellular cytokine analysis via flow cytometry.** Cytokine production in CD4<sup>+</sup> T-cells was analyzed via polychromatic flow cytometry. Live cells were identified by a gate on Live/Dead Near infra-red staining. Next, doublets were excluded by an FSC-A (area)/FSC-W (width) gate. Lymphocytes were then identified by cell size (FSC-A) and granularity (SSC-A). CD4<sup>+</sup> T-cells were identified via CD3 and CD4 markers and IFN- $\gamma$  production was analyzed in live single CD4<sup>+</sup> T cells. CD4<sup>+</sup> and IFN- $\gamma$ <sup>+</sup> CD4<sup>+</sup> cells were further differentiated into naïve, central and effector memory cells (T naïve, T<sub>CM</sub>, T<sub>EM</sub> respectively) via CCR7 and CD8 $\alpha$  markers. T<sub>CM</sub> is CCR7<sup>+</sup>CD8 $\alpha$ <sup>+</sup> and T<sub>EM</sub> is CCR7<sup>-</sup>CD8 $\alpha$ <sup>+</sup>. Gating is based on the relevant fluorescent minus one (FMO) controls.
