# Supplementary material for: Mucosal Vaccination with UV-Inactivated Chlamydia suis in Pre-Exposed Outbred Pigs Decreases Pathogen Load and Induces CD4 T-Cell Maturation into IFN-γ+ Effector Memory Cells
Source: Vaccines (Basel). 2020 Jul 2;8(3):353. doi: 10.3390/vaccines8030353 (PMC7564508; doi:10.3390/vaccines8030353)
Supplement: Supplementary file 1 [file vaccines-08-00353-s001.zip › Amaral et al, 2020_Sup Table S1.pdf]

**Supplementary Table S1. Blood CD4<sup>+</sup> T cell total mRNAs profiled using RNA-seq.** The pairwise differential gene expression analysis between non-challenged MOCK and challenged groups (*C. suis* challenged, *C. suis* challenged + vaccinated and *C. suis* challenged + Tri Adjuvant vaccinated) was assessed using DESeq2. Significance of the canonical pathway was assessed using Fisher's exact test. All multiple testing was adjusted by Benjamini-Hochberg.

| Ensemble Gene ID    | Gene Symbol              | Gene Name                                                    | General Function            | Log2 Fold Change | Adjusted p value |
|---------------------|--------------------------|--------------------------------------------------------------|-----------------------------|------------------|------------------|
| ENSSSCG00000026842  | CDH18                    | cadherin 18                                                  | adhesion                    | 6.514001499      | 0.003218955      |
| ENSSSCG00000000857  | IGF1                     | insulin-like growth factor 1                                 | growth and proliferation    | 6.495027138      | 0.002942227      |
| ENSSSCG00000009502  | UGGT2                    | UDP-glucose glycoprotein glucosyltransferase 2               | metabolism                  | 6.09677358       | 0.002983538      |
| ENSSSCG00000027678  | CCDC175                  | coiled-coil Domain Containing 175                            | structure and trafficking   | 5.919923343      | 0.008648947      |
| ENSSSCG00000032365  | GPR87                    | G-protein coupled receptor 87                                | communication and migration | 5.828547485      | 0.019395021      |
| ENSSSCG00000012002  | ROBO2                    | roundabout guidance receptor 2                               | proliferation and migration | 5.711321741      | 0.005599321      |
| ENSSSCG00000035000  | ABCA16                   | ATP-binding cassette sub-family A, member 16                 | molecular transport         | 5.540309545      | 0.01728579       |
| ENSSSCG00000016554  | MEST                     | mesoderm specific transcript                                 | metabolism                  | 5.320303203      | 0.02209914       |
| ENSSSCG00000009217  | PKD2                     | polycystin 2                                                 | ion channel                 | 5.213497139      | 0.024469655      |
| ENSSSCG00000013382  | PLEKHA7                  | pleckstrin homology domain containing A7                     | adhesion                    | 5.146365546      | 0.015107422      |
| ENSSSCG00000030877  | FRMPD4                   | FERM and PDZ domain containing 4                             | scaffolding                 | 5.140995088      | 0.003574795      |
| ENSSSCG00000017261  | ARSG                     | arylsulfatase G                                              | metabolism                  | 5.121888326      | 0.015931799      |
| ENSSSCG00000022741  | PDGFRB                   | platelet dervied growth factor receptor beta                 | growth                      | 5.110208465      | 0.037526456      |
| ENSSSCG00000034000  | SERPINB11L1 <sup>1</sup> | Serpin-like B11                                              | metabolism                  | 5.008991958      | 0.044098118      |
| ENSSSCG00000007675  | EPHB4                    | ephrin type-B receptor                                       | proliferation               | 4.81030992       | 0.041831729      |
| ENSSSCG00000002277  | SPTB                     | spectrin beta                                                | membrane stability          | 4.795997278      | 0.018496517      |
| ENSSSCG00000005762  | KCNT1                    | potassium channel subfamily T, member 1                      | ion channel                 | 4.690706608      | 0.028148799      |
| ENSSSCG00000003251  | NLRP12                   | NLR family pyrin domain containing 12                        | inflammation                | 4.57693532       | 0.038584841      |
| ENSSSCG00000011485  | PTPRG                    | protein tyrosine phosphatase receptor type G                 | growth and migration        | 4.514900161      | 0.029148929      |
| ENSSSCG00000003789  | CTH                      | cystathionine gamma-lyase                                    | metabolism                  | 4.484348504      | 0.006405136      |
| ENSSSCG00000016678  | NOD1                     | nucleotide binding oligomerization domain containing 1       | inflammation                | 4.388027764      | 0.0035279        |
| ENSSSCG00000010626  | RBM20                    | RNA binding motif 20                                         | alternative splicing        | 4.382216306      | 0.024142368      |
| ENSSSCG00000039854  | TLCD4                    | TLC domain containing 4                                      | metabolism                  | 4.339526312      | 0.04830757       |
| ENSSSCG00000036553  | SAMD12                   | sterile alpha motif domain containing 12                     | DNA binding                 | 4.184921478      | 0.025461995      |
| ENSSSCG00000032946  | HMGN5                    | high mobility group nueclosome binding domain 5              | DNA binding                 | 4.144044731      | 0.029480236      |
| ENSSSCG00000040967  | NACC2                    | nuclus accumbens-associated protein 2                        | transcriptional regulation  | 4.068007871      | 0.046812872      |
| ENSSSCG00000021562  | PLXNA4                   | plexin A4                                                    | cytoskeleton remodeling     | 4.041299219      | 0.018980378      |
| ENSSSCG00000009429  | TNFSF11                  | tumor necrosis factor ligand superfamily member 11           | inflammation and activation | 4.011210923      | 0.020315766      |
| ENSSSCG00000013147  | FAM111B                  | family with sequence similiarity 111 member B                | metabolism                  | 3.941219485      | 0.016870537      |
| ENSSSCG000000008761 | TBC1D19                  | TBC1 domain family member 19                                 | signaling and metabolism    | 3.932766694      | 0.011187952      |
| ENSSSCG00000014625  | TRIM3                    | tripartite motif containing 3                                | molecular transport         | 3.87494137       | 0.025398417      |
| ENSSSCG00000020864  | VDR                      | vitamin D3 receptor                                          | metabolism and inflammation | 3.816828275      | 0.036776221      |
| ENSSSCG00000011353  | PFKFB4                   | 6-phospho-fructo-2-kinase/fructose-2,6-biphosphatase 4       | metabolism                  | 3.81025969       | 0.018098585      |
| ENSSSCG00000014179  | FAM174A                  | family with sequence similiarity 174 member A                | signaling                   | 3.757174913      | 0.038221344      |
| ENSSSCG00000024065  | TMTC2                    | transmembrane O-mannosyltransferase                          | metabolism                  | 3.749174547      | 0.040946516      |
| ENSSSCG00000032086  | ZNF583                   | zinc finger protein 583                                      | transcriptional regulation  | 3.721583593      | 0.007057135      |
| ENSSSCG00000035258  | RABL3                    | member of RAS oncogene family like 3                         | signaling                   | 3.700079683      | 0.002271332      |
| ENSSSCG00000037475  | CTSG                     | cathepsin G                                                  | inflammation                | 3.581407665      | 0.024589968      |
| ENSSSCG00000015808  | ADAM9                    | disintegrin and metalloproteinase domain- containg protien 9 | adhesion                    | 3.426658472      | 0.018098585      |
| ENSSSCG00000011755  | NCEH1                    | neutral cholesterol ester hydrolase 1                        | metabolism                  | 3.407326519      | 0.008197997      |
| ENSSSCG00000037420  | TMEM170B                 | transmembrane protein 170B                                   | signaling                   | 3.37910639       | 0.049163621      |
| ENSSSCG00000022131  | KCTD6                    | potassium channel tetramerization domain containg 6          | signaling                   | 3.359860673      | 0.020781425      |
| ENSSSCG00000031847  | RBM28                    | RNA binding motif 28                                         | transcriptional regulation  | 3.336667366      | 0.012149562      |
| ENSSSCG00000012172  | ACOT9                    | acyl-CoA thioesterase 9                                      | metabolism                  | 3.315946983      | 0.032564652      |

**Supplementary Table S1 (CONTINUATION). Blood CD4<sup>+</sup> T cell total mRNAs profiled using RNA-seq.** The pairwise differential gene expression analysis between non-challenged MOCK and challenged groups (*C. suis* challenged, *C. suis* challenged + vaccinated and *C. suis* challenged + Tri Adjuvant vaccinated) was assessed using DESeq2. Significance of the canonical pathway was assessed using Fisher's exact test. All multiple testing was adjusted by Benjamini-Hochberg.

| Ensemble             | Gene ID | Gene Symbol | Gene Name                                                                                                       | General Function            | Log2 Fold Change | Adjusted p value |
|----------------------|---------|-------------|-----------------------------------------------------------------------------------------------------------------|-----------------------------|------------------|------------------|
| ENSSSCG000000013861  |         | SLC35E1     | solute carrier family 35 member E1                                                                              | molecular transport         | 3.314660992      | 0.00877453       |
| ENSSSCG000000038493  |         | PFDN1       | prefolding subunit 1                                                                                            | molecular transport         | 3.263456994      | 0.026294999      |
| ENSSSCG000000035193  |         | MRPS23      | mitochondrial ribosomal protein S23                                                                             | survival                    | 3.162095174      | 0.048396984      |
| ENSSSCG000000037325  |         | UBIAD1      | ubiA prenyltransferase domain containing 1                                                                      | metabolism                  | 3.127636805      | 0.027705123      |
| ENSSSCG000000005011  |         | NEMF        | nuclear export mediator factor                                                                                  | molecular transport         | 3.113457185      | 0.004908871      |
| ENSSSCG000000002305  |         | EXD2        | exonuclease 3'-5' domain containing 2                                                                           | DNA repair                  | 3.088641479      | 0.032943414      |
| ENSSSCG000000015892  |         | PSMD14      | proteasome 26S subunit, non-ATPase 14                                                                           | protein degradation         | 3.054264429      | 0.016268598      |
| ENSSSCG000000003162  |         | UBAC1       | ubiquitin-associated domain-containing 1                                                                        | protein degradation         | 3.025612433      | 0.0122442        |
| ENSSSCG000000009193  |         | SMARCAD1    | SWI/SNF-related, matrix-associated actin-dependent regulator of chromatin, subfamily A, containing DEAD/H Box 1 | DNA binding                 | 3.001023959      | 0.002894647      |
| ENSSSCG000000016226  |         | FARSB       | phenylalanyl-tRNA synthetase beta chain                                                                         | metabolism                  | 2.994310907      | 0.00371746       |
| ENSSSCG000000012131  |         | MOSPD2      | motile sperm domain containing 2                                                                                | metabolism                  | 2.9913784        | 0.006024667      |
| ENSSSCG000000009305  |         | GTF3A       | general transcription factor 3A                                                                                 | transcription               | 2.987510154      | 0.036921829      |
| ENSSSCG000000028345  |         | ZNF33B      | zing finger protein 33B                                                                                         | signaling and metabolism    | 2.966858443      | 0.015945452      |
| ENSSSCG000000004946  |         | ZWILCH      | zwilch kinetochore protein                                                                                      | proliferation               | 2.92507877       | 0.036921829      |
| ENSSSCG000000032580  |         | MGST1       | microsomal glutathione s-transferase 1                                                                          | metabolism                  | 2.89902142       | 0.039963149      |
| ENSSSCG000000000844  |         | NFYB        | nuclear transcription factor Y subunit beta                                                                     | transcriptional regulation  | 2.893050892      | 0.019602372      |
| ENSSSCG000000002525  |         | TRAF3       | TNF receptor associated factor 3                                                                                | signaling and inflammation  | 2.885270408      | 0.029148929      |
| ENSSSCG000000032919  |         | ATG4B       | autophagy related 4B cysteine peptidase                                                                         | autophagy                   | 2.821028399      | 0.032943414      |
| ENSSSCG000000002937  |         | ZNF420      | zing finger protein 420                                                                                         | signaling and metabolism    | 2.793284015      | 0.039273246      |
| ENSSSCG000000020885  |         | NUS1        | nuclear undecaprenyl pyrophosphate synthetase 1                                                                 | metabolism                  | 2.769905114      | 0.02991454       |
| ENSSSCG000000005507  |         | PSMD5       | proteasome 26S subunit, non-ATPase 5                                                                            | protein degradation         | 2.758698463      | 0.048977939      |
| ENSSSCG000000005587  |         | NEK6        | NIMA related kinase 6                                                                                           | signaling and proliferation | 2.717168935      | 0.04243732       |
| ENSSSCG000000000964  |         | LMF2        | lipase maturation factor 2                                                                                      | metabolism                  | 2.685857445      | 0.031616857      |
| ENSSSCG000000003506  |         | PINK1       | PTEN induced kinase 1                                                                                           | signaling                   | 2.662957517      | 0.045979115      |
| ENSSSCG000000010949  |         | DAPK1       | death associated protein kinase 1                                                                               | signaling and survival      | 2.635847767      | 0.029957851      |
| ENSSSCG000000012424  |         | ABCB7       | ATP-binding cassette sub-family B, member 7                                                                     | molecular transport         | 2.494990364      | 0.015843827      |
| ENSSSCG000000033295  |         | EIF2S1      | eukaryotic translation initiation factor 2 subunit alpha                                                        | protein synthesis           | 2.474632908      | 0.009531644      |
| ENSSSCG000000011162  |         | LARP4B      | La ribonucleoprotein 4B                                                                                         | DNA binding                 | 2.454986159      | 0.044627204      |
| ENSSSCG000000001667  |         | ZNF318      | zing finger protein 318                                                                                         | signaling and metabolism    | 2.449922752      | 0.046620743      |
| ENSSSCG000000015590  |         | FLVCR1      | feline leukemia virus subgroup C receptor-related 1                                                             | molecular transport         | 2.396401517      | 0.038596864      |
| ENSSSCG000000013347  |         | PRMT3       | protein arginine methyltransferase 3                                                                            | metabolism                  | 2.357566489      | 0.033986845      |
| ENSSSCG0000000036790 |         | AKAP7       | A-kinase anchoring protein                                                                                      | signaling                   | 2.356699873      | 0.037294235      |
| ENSSSCG000000038895  |         | DCTN6       | dynactin subunit 6                                                                                              | molecular transport         | 2.345543214      | 0.031545264      |
| ENSSSCG000000033154  |         | ARL6IP5     | ADP ribosylation factor like GTPase 6 interacting protein 5                                                     | signaling                   | 2.341746948      | 0.012797427      |
| ENSSSCG000000006346  |         | ATF6        | activating transcription factor 6                                                                               | transcription               | 2.309316884      | 0.033964553      |
| ENSSSCG000000002844  |         | PHKB        | phosphorylase kinase regulatory subunit beta                                                                    | signaling                   | 2.294356394      | 0.01654099       |
| ENSSSCG000000010874  |         | ADSS        | adenylsuccinate synthase 2                                                                                      | metabolism                  | 2.272571211      | 0.031666077      |
| ENSSSCG000000004576  |         | RORA        | RAR related orphan recetor A                                                                                    | transcriptional regulation  | 2.240683079      | 0.017383661      |
| ENSSSCG0000000040954 |         | CSTF3       | cleavage stimulation factor subunit 3                                                                           | transcriptional regulation  | 2.19786242       | 0.039135766      |
| ENSSSCG000000004999  |         | MIS18BP1    | MIS18 binding protein                                                                                           | DNA binding                 | 2.178375045      | 0.03583276       |
| ENSSSCG000000011833  |         | DLG1        | discs large MAGUK scaffold protein 1                                                                            | signaling                   | 2.003275128      | 0.027896597      |
| ENSSSCG000000032357  |         | APPL1       | adaptor protein, phosphotyrosine interacting with PH domain and leucine zipper 1                                | proliferation               | 1.92155645       | 0.037191961      |
| ENSSSCG000000002701  |         | MON1B       | MON1 homolog B                                                                                                  | molecular transport         | 1.772512299      | 0.048396984      |
| ENSSSCG000000033115  |         | IFNAR1      | interferon alpha and beta subunit 1                                                                             | signaling and inflammation  | 1.572971046      | 0.017506452      |
| ENSSSCG000000006553  |         | UBAP2L      | Ubiquitin-associated protein 2 L                                                                                | protein degradation         | 1.177037687      | 0.039579458      |

<sup>†</sup>no human ortholog
